# Supplementary material
Source: PubMed Central journal article supplement (PMC1599998)
Supplement: pnas_0604469103_2.pdf [file pnas_0604469103_2.pdf]

Table 1. LANA-repressed genes (TIME-LANA versus TIME-Babe)

| Fold repression | Gene name                                                            | Fold repression | Gene name                                                             |
|-----------------|----------------------------------------------------------------------|-----------------|-----------------------------------------------------------------------|
| 2.4             | GA-binding protein transcription factor, beta subunit 2              | 3.5             | Ras association (RalGDS/AF-6) domain family 2                         |
| 2.4             | heparin-binding growth factor receptor (HBGF-R-alpha-a3)             | 3.5             | natural killer cell enhancing factor                                  |
| 2.4             | GABA-B receptor splice variant 1                                     | 3.6             | riban protein                                                         |
| 2.5             | collagen, type I, alpha 2                                            | 3.6             | maternally expressed 3                                                |
| 2.5             | LIM domain only 2 (rhombotin-like 1)                                 | 3.7             | membrane glycoprotein LIG-1                                           |
| 2.5             | LIM domain binding 2                                                 | 3.7             | CXCR4 gene encoding receptor CXCR 4                                   |
| 2.5             | alpha-actinin-2 associated LIM protein                               | 3.7             | goliath protein                                                       |
| 2.5             | fibroblast growth factor receptor 1 (fms-related tyrosine kinase 2)  | 3.7             | transporter similar to yeast MRS2                                     |
| 2.5             | GABA-B receptor R2                                                   | 3.7             | transmembrane 4 superfamily member (tetraspan NET-2)                  |
| 2.6             | prolylcarboxypeptidase (angiotensinase C)                            | 3.8             | cellular repressor of E1A-stimulated genes                            |
| 2.6             | collagen, type V, alpha 1                                            | 3.9             | adducin 3 (gamma)                                                     |
| 2.6             | interferon stimulated gene (20KD)                                    | 3.9             | pellino (Drosophila) homolog 2                                        |
| 2.7             | cell division cycle 42 (GTP-binding protein, 25KD)                   | 4.0             | natriuretic peptide receptor                                          |
| 2.8             | Wiskott-Aldrich syndrome protein interacting protein                 | 4.2             | putative integral membrane transporter                                |
| 2.8             | BMX non-receptor tyrosine kinase                                     | 4.2             | lactate dehydrogenase B                                               |
| 2.8             | insulin receptor substrate-2                                         | 4.2             | thyroid hormone receptor interactor 7                                 |
| 2.8             | lipase, endothelial                                                  | 4.3             | FN5 protein                                                           |
| 2.8             | 3-oxoacid CoA transferase                                            | 4.6             | cyclin D2                                                             |
| 2.8             | IARreceptor-like protein-tyrosine phosphatase precursor              | 4.7             | histamine N-methyltransferase                                         |
| 2.8             | extracellular link domain-containing 1                               | 4.7             | histatin 3                                                            |
| 2.8             | mannosidase, alpha, class 1A, member 1                               | 4.7             | inositol 1,4,5-trisphosphate receptor type 1                          |
| 2.9             | protein tyrosine phosphatase, non-receptor type 22 (lymphoid)        | 4.8             | platelet-activating factor acetylhydrolase, isoform lb, gamma subunit |
| 2.9             | Human insulin-like growth factor binding protein 5 (                 | 4.9             | monoamine oxidase A, nuclear gene encoding mitochondrial protein      |
| 2.9             | protein tyrosine phosphatase, receptor type,                         | 4.9             | endomucin-2                                                           |
| 2.9             | aryl hydrocarbon receptor                                            | 5.0             | cadherin 13, H-cadherin                                               |
| 2.9             | carbohydrate (chondroitin 6sulfate) sulfotransferase 1               | 5.0             | lymphocyte cytosolic protein 2                                        |
| 3.0             | CED-6 protein                                                        | 5.2             | aldehyde dehydrogenase 2, mitochondrial                               |
| 3.0             | origin recognition complex subunit 3                                 | 5.3             | matrix metalloproteinase 10 (stromelysin 2)                           |
| 3.1             | highly similar to HUMSNF2L                                           | 5.3             | phospholipase C-beta-1                                                |
| 3.1             | beta-site APP-cleaving enzyme 2                                      | 6.1             | adenyl cyclase-associated protein 2                                   |
| 3.1             | Similar to loss of heterozygosity, 11, chromosomal region 2, gene A  | 8.2             | lactate dehydrogenase B                                               |
| 3.2             | RAB38, member RAS oncogene family                                    | 8.8             | zinc finger protein 91                                                |
| 3.3             | SWSNF related, actin dependent regulator of chromatin, subfamily a 3 | 9.6             | EH-domain containing 3                                                |
| 3.3             | reelin                                                               | 10.0            | sarcoglycan, epsilon                                                  |
| 3.3             | hyaluronidase receptor                                               | 10.1            | GABA-B receptor                                                       |
| 3.3             | 5T4 oncofetal trophoblast glycoprotein                               | 10.5            | B cell RAG associated protein n                                       |
| 3.4             | N-acetylglucosamine-phosphate mutase                                 | 14.9            | fatty acid binding protein 5                                          |
| 3.4             | tetraspan NET-6 protein                                              | 17.4            | forkhead boxG1B                                                       |
| 3.5             | hydroxyacyl-Coenzyme A dehydrogenase                                 | 17.4            | angiopoietin-2 isoform-1                                              |
|                 |                                                                      | 23.8            | matrix metalloproteinase 1                                            |
|                 |                                                                      | 27.8            | endostatin receptor type B, isoform 1                                 |
