# Supplementary material
Source: PubMed Central journal article supplement (PMC1599998)

**A**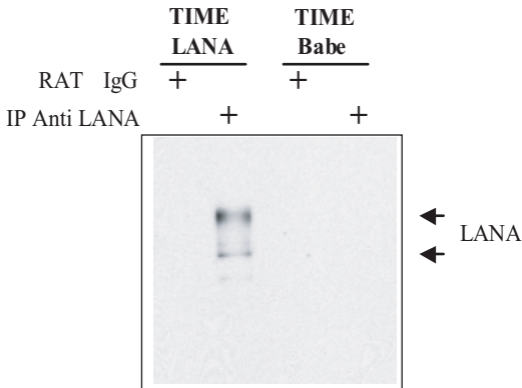**WB: Anti LANA****B**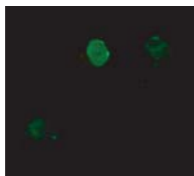

Anti LANA

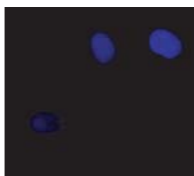

DAPI

Supplement: pnas_0604469103_1.pdf [file pnas_0604469103_1.pdf]
